# Supplementary material
Source: PubMed Central journal article supplement (PMC6933534)
Supplement: suppelementary_data_nnakai_dfz022.pdf [file suppelementary_data_nnakai_dfz022.pdf]

# Supplementary Figure 1

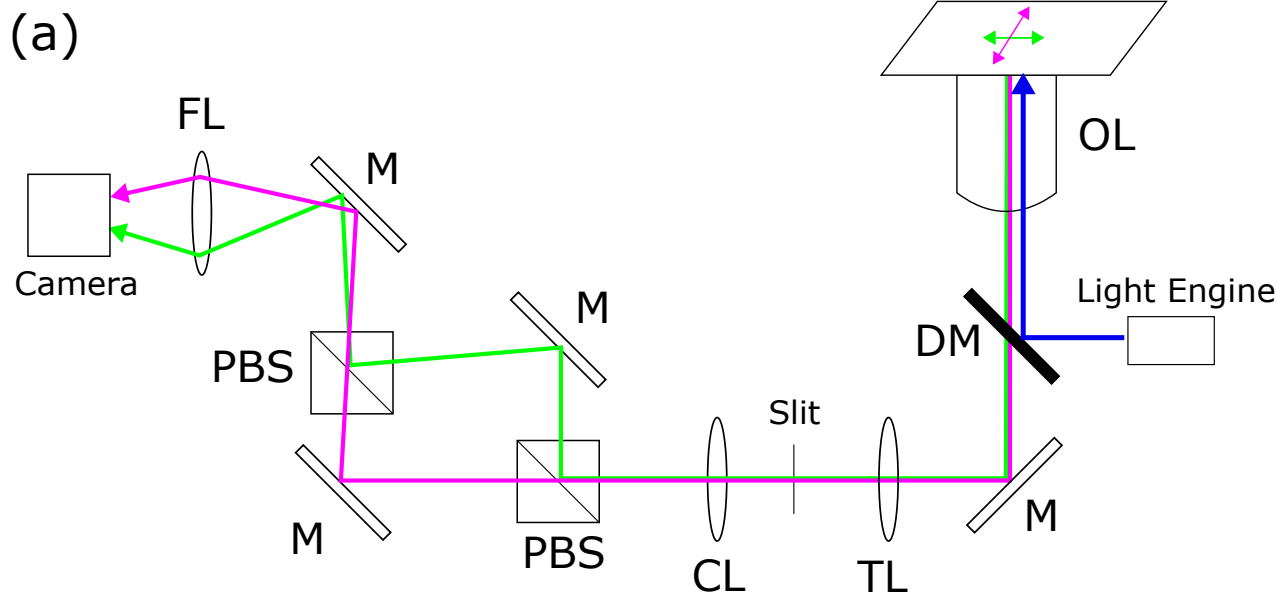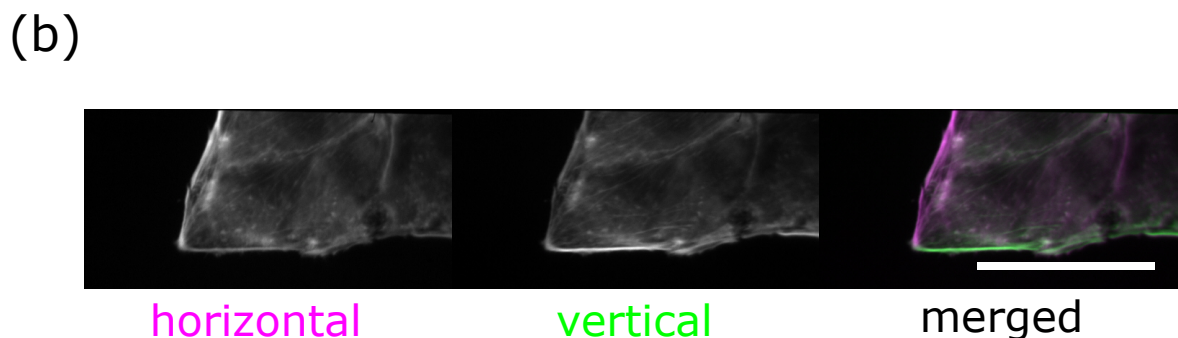

Fluorescence polarization microscope (FPM) setup. (a) Schematic drawing of our FPM. OL, objective lens; DM, dichroic mirror, M, mirror; TL, tube lens; CL, collimating lens; PBS, polarization beam splitter; FL, focusing lens. (b) Fluorescence image of fixed LLC-PK1 stained with Atto565-phalloidin. Polarized fluorescence along  $0^\circ$  (left, horizontal polarization) and the polarized fluorescence along  $90^\circ$  (middle, vertical polarization) were shown in pseudocolors, magenta and green, respectively before merged (right). (Scale bar:  $50\ \mu\text{m}$ )

## Supplementary Data

### Sequence information

cpGFP<sup>CT3/10</sup>

MGVVPILVELDGDVNGHKFSVRGEGEGDATIGKLTCLKFICTTGKLPVPWPTLVTTTLTYGVQCFSRYP  
DHMKRHDFFKSAMPEGYVQERTISFKDDGKYKTRAVVKFEGDTLVNRIELKGTDFKEDGNILGHKL  
EYNFNHNVYITADKQKNGIKANFTVRHNVEDGVSQVLADHYQQNTPIGDGPVLLPDNHYLSTQTV  
LSKDPNEKRDHMLHEYVNAAGITLGMDELYKGGGSSKGEELFTEAAAKAGS\*

(The underlined amino acids are added to the cpGFP.)

cpGFP-Lifeact (L18)

MGVVPILVELDGDVNGHKFSVRGEGEGDATIGKLTCLKFICTTGKLPVPWPTLVTTTLTYGVQCFSRYP  
DHMKRHDFFKSAMPEGYVQERTISFKDDGKYKTRAVVKFEGDTLVNRIELKGTDFKEDGNILGHKL  
EYNFNHNVYITADKQKNGIKANFTVRHNVEDGVSQVLADHYQQNTPIGDGPVLLPDNHYLSTQTV  
LSKDPNEKRDHMLHEYVNAAGITLGMDELYKGGGSSKGEELFTEAAAKEAVADLIKKFESISKEE  
GDATVDTNSS\*

(The underlined amino acids are the helical linker.)

cpGFP $\Delta$ C-UtrCH $\Delta$ N (GU14)

MGVVPILVELDGDVNGHKFSVRGEGEGDATIGKLTCLKFICTTGKLPVPWPTLVTTTLTYGVQCFSRYP  
DHMKRHDFFKSAMPEGYVQERTISFKDDGKYKTRAVVKFEGDTLVNRIELKGTDFKEDGNILGHKL  
EYNFNHNVYITADKQKNGIKANFTVRHNVEDGVSQVLADHYQQNTPIGDGPVLLPDNHYLSTQTV  
LSKDPNEKRDHMLHEYVNAAGITLGMDELYKGGGSSKGEELFEAAAKAAVQKKTFKWINARFS  
KSGKPPINDMFTDLKDGRKLLDLLEGLTGTSLPKERGSTRVHALNNVNRVLQVLHQNNVELVNIGG  
TDIVDGNHKLTLGLLWSIILHWQVKDVMKDVMSDLQQTNSEKILLSWVRQTTRPYSQVNVLNFTT  
SWTDGLAFNAVLHRHKPDLFSWDKVVKMSPIERLEHAFSKAQTYLIEKLLDPEDVAVRLPDKKSI  
MYLTSLEFVLPQQVTID\*

(The underlined amino acids are the helical linker.)

UtrCH $\Delta$ C-mEGFP $\Delta$ N (UG7)

MAKYGEHEASPDNGQNEFSDIKSRSDHNDVQKKTFTKWINARFSKSGKPPINDMFTDLKDGRKL  
DLLEGLTGTSLPKERGSTRVHALNNVNRVLQVLHQNNVELVNIGGTDIVDGNHKLTLGLLWSIILH  
WQVKDVMKDVMSDLQQTNSEKILLSWVRQTTRPYSQVNVLNFTTTSWTDGLAFNAVLHRHKPDLF  
SWDKVVKMSPIERLEHAFSKAQTYLIEKLLDPEDVAVRLPDKKSIIMYLFEEAAAKAELFTGVVPIL  
VELDGDVNGHKFSVSGEGEGDATYGLKLTCLKFICTTGKLPVPWPTLVTTTLTYGVQCFSRYPDHMKQH  
DFFKSAMPEGYVQERTIFFKDDGNYKTRAEVKFEGDTLVNRIELKGTDFKEDGNILGHKLEYNYS  
HNVIYIMADKQKNGIKVNFKIRHNIEDGVSQVLADHYQQNTPIGDGPVLLPDNHYLSTQSKLSKDPNE  
KRDHMLLEFVTAAGITLGMDELYK\*

(The underlined amino acids are the helical linker.)
